# Supplementary material for: Gynaecomastie en mastodynie als gevolg van androgeendeprivatietherapie bij prostaatkanker
Source: Springer Nature journal article supplement (doi:10.1007/s13629-021-00344-9), 2022-01-01
Supplement: MOESM1 [file 20002304]

## Bijlage 4

### Zelfontwikkelde vragen

1. Welk van onderstaande (anti)hormonale therapie gebruikt u of heeft u gebruikt?  
(Meerdere antwoorden mogelijk)
  - leuproreline (Eligard of Lucrin)
  - gosereline (Zoladex)
  - busereline (Suprefact)
  - bicalutamide (Casodex)
  - enzalutamide (Xtandi)
  - abiraterone (Zytiga)
  - anders, namelijk: .....
  - operatie: testosteronproducerend weefsel uit de zaadballen verwijderd
  
2. Heeft u informatie gekregen over de mogelijke bijwerkingen van de behandeling met (anti)hormonale therapie?
  - Ja
  - Nee (Ga naar vraag 4)
  
3. Van wie heeft u informatie gekregen over de bijwerkingen van de (anti)hormonale behandeling?  
(meerdere antwoorden mogelijk).
  - de uroloog
  - de oncoloog
  - de triageverpleegkundige van de urologie
  - de oncologieverpleegkundige
  - de verpleegkundige die de injectie thuis toedient
  - de verpleegkundige specialist in opleiding
  - weet ik niet
  - anders, namelijk: .....

### Ga na vraag 3 verder met vraag 5

4. Had u behoefte gehad aan informatie?
  - ja (ga naar vraag 10A en 10B)
  - nee (ga naar vraag 11)
  
5. In welke vorm is de informatie gegeven?
  - mondeling (ga naar vraag 7)
  - schriftelijk (ga naar vraag 6)
  - beide (ga naar vraag 7)
  
6. had u behoefte gehad aan mondelinge informatie?
  - ja
  - nee

7. Is door de zorgverlener(s) de bijwerking 'abnormale zwelling van de borsten' of 'borstvergroting' genoemd?
- ja
  - nee
8. Is door de zorgverlener(s) de bijwerking 'gevoelige en/of pijnlijke borsten' genoemd?
- ja
  - nee
9. Welke van de volgende mogelijke bijwerkingen zijn genoemd?
- opvliegers
  - erectieproblemen
  - verminderde seksuele drang (libidoverlies)
  - sombere buien
  - gebrek aan energie
  - gewichtsverandering
  - veranderde vetverdeling in het lichaam
  - verandering van de lichaamsbehaarings
  - botontkalking
  - anders, namelijk: .....
10. A. Wat vindt u een goed moment om informatie over de bijwerkingen van (anti) hormonale therapie te krijgen?
- voor de start van de (anti)hormonale therapie
  - bij het optreden van klachten door (anti)hormonale therapie
  - anders, namelijk: .....
- B. Van wie zou u de informatie willen hebben? (Meerdere antwoorden mogelijk).
- de uroloog
  - de oncoloog
  - de triageverpleegkundige van de urologie
  - de oncologieverpleegkundige
  - de verpleegkundige die de injectie thuis toedient
  - de verpleegkundige specialist in opleiding
  - weet ik niet
  - anders, namelijk: .....

Er zijn behandelingen bekend die het risico op vergrote borsten en gevoelige borsten kunnen verkleinen. Van tevoren is niet te voorspellen wie last krijgt van borstvergroting of gevoelige borsten. Ongeveer een op de vier mannen kan last krijgen van deze bijwerkingen.

De mogelijke behandelingen zijn:

**Optie 1: Eén keer een korte bestraling met een lage dosis radiotherapie op de borstklieren voor aanvang van de behandeling met (anti) hormonale therapie. De bijwerking van radiotherapie, zoals roodheid na de behandeling, is mild, van korte duur en voorbijgaand.**

**Optie 2: Elke dag een tablet Tamoxifen (een anti-oestrogeen) gedurende de behandeling met (anti) hormonale therapie. Dit heeft volgens onderzoekers geen negatief effect op de kwaliteit van leven. De bijwerkingen zijn opvliegers en transpireren.**

11. Zou u kiezen voor een van deze behandelingen?

- Ja
- Nee (Ga naar vraag 17)

12. Welke behandeling zou u dan kiezen?

A.  Eenmalige bestraling.

Wat is uw overweging voor deze behandeling te kiezen?

.....  
.....  
.....

A1. Ook als dit inhoudt dat de (anti) hormonale therapie op een later moment wordt gestart?

- Nee
- Ja

A2. Ook als u niet zeker wist of u grotere borsten zou krijgen (kans ± 25%)?

- Nee
- Ja

B.  Dagelijks een tablet Tamoxifen

Wat is uw overweging voor deze behandeling te kiezen?

.....  
.....  
.....

B1. Ook als u niet zeker wist of u een borstvergroting zou krijgen (kans ± 25%)?

- Nee
- Ja

13. Wat is uw overweging geen voorkeur te hebben voor een van deze twee behandelingen?

.....  
.....  
.....
